# Supplementary material for: HD-FFQ to Detect Nutrient Deficiencies and Toxicities for a Multiethnic Asian Dialysis Population
Source: MDPI journal article supplement (doi:10.3390/nu12061585), 2020-05-28
Supplement: s1 [file s1]

Table S1: Patient Characteristics in Phase I

| <b>Patients characteristics</b>      | <b>All (n=388)</b> |
|--------------------------------------|--------------------|
| Age (year)                           | 54 ± 15            |
| Gender, n (%)                        |                    |
| Male                                 | 213 (54.9)         |
| Female                               | 175 (45.1)         |
| Ethnic group, n (%)                  |                    |
| Malay                                | 154 (39.7)         |
| Chinese                              | 151 (38.9)         |
| Indian                               | 79 (20.3)          |
| Others                               | 4 (1.1)            |
| Marital status, n (%)                |                    |
| Married                              | 304 (78.3)         |
| Single                               | 79 (20.4)          |
| Others                               | 5 (1.3)            |
| Education level, n (%)               |                    |
| No formal education                  | 27 (7)             |
| Primary                              | 93 (24)            |
| Secondary                            | 176 (45.4)         |
| Tertiary,<br>(college/university)    | 92 (23.6)          |
| Working status, n (%)                |                    |
| Yes                                  | 102 (26.3)         |
| No                                   | 286 (73.7)         |
| Dialysis Vintage (months)            | 78 ± 74            |
| Post-dialysis weight (kg)            | 61.7 ± 14.7        |
| Height (cm)                          | 158 ± 9            |
| Body Mass Index (kg/m <sup>2</sup> ) | 24.6 ± 5.2         |

Note: Data are presented as mean ± SD unless stated as percentage (%).

Table S2: Food item listing in the prototype HD-FFQ

| <b>No.</b>              | <b>Food Groupings</b>             | <b>Subgroups</b>                                                                                                  | <b>Total food items</b> |
|-------------------------|-----------------------------------|-------------------------------------------------------------------------------------------------------------------|-------------------------|
| 1.                      | Cooked rice                       | -                                                                                                                 | 6                       |
| 2.                      | Noodles                           | 5 subgroups:<br>(a) Rice/starch<br>noodles<br>(b) Wheat noodles<br>(c) Instant noodles<br>(d) Pasta<br>(e) Others | 10                      |
| 3.                      | Cereals & products                | 4 subgroups:<br>(a) Biscuits<br>(b) Bread<br>(c) Bun/croissant<br>(d) Others                                      | 15                      |
| 4.                      | Meat, poultry & products          | -                                                                                                                 | 6                       |
| 5.                      | Fish, shellfish & products        | -                                                                                                                 | 6                       |
| 6.                      | Legumes                           | -                                                                                                                 | 4                       |
| 7.                      | Vegetables                        | -                                                                                                                 | 6                       |
| 8.                      | Fruit                             | -                                                                                                                 | 13                      |
| 9.                      | Fast foods                        | -                                                                                                                 | 4                       |
| 10.                     | Milk & dairy products             | -                                                                                                                 | 2                       |
| 11.                     | Traditional kuih                  | 3 subgroups:<br>(a) Malay kuih<br>(b) Chinese kuih<br>(c) Indian kuih                                             | 6                       |
| 12.                     | Bakery & sweets                   | -                                                                                                                 | 4                       |
| 13.                     | Snacks & finger foods             | -                                                                                                                 | 11                      |
| 14.                     | Jam & spread                      | -                                                                                                                 | 4                       |
| 15.                     | Beverages                         | 3 subgroups:<br>(a) Coffee/tea<br>(b) Malted drink<br>(c) Others                                                  | 10                      |
| 16.                     | Sauces, condiments & soups        | -                                                                                                                 | 9                       |
| 17.                     | Health/oral nutrition supplements | -                                                                                                                 | 2                       |
| <b>Total food items</b> |                                   |                                                                                                                   | <b>118</b>              |

Table S3: Conversion factor for the frequency of food item intake

| <b>Frequency of intake</b> | <b>Conversion Factor</b> |
|----------------------------|--------------------------|
| Per day                    | $1/1 = 1.00$             |
| Per week                   | $1/7 = 0.14$             |
| Per month                  | $1/30 = 0.03$            |

Figure S1: Bland-Altman Plot for dietary intakes derived by HD-FFQ and 3DDR methods

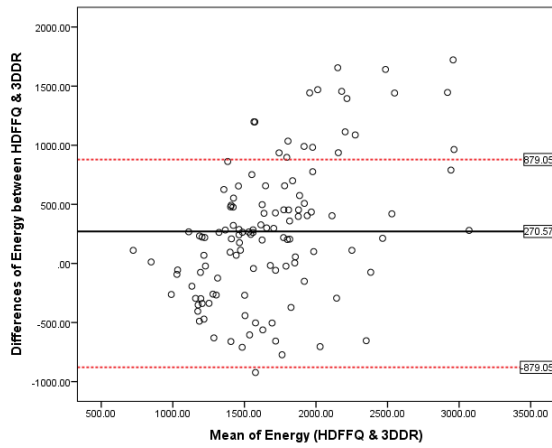

(A)

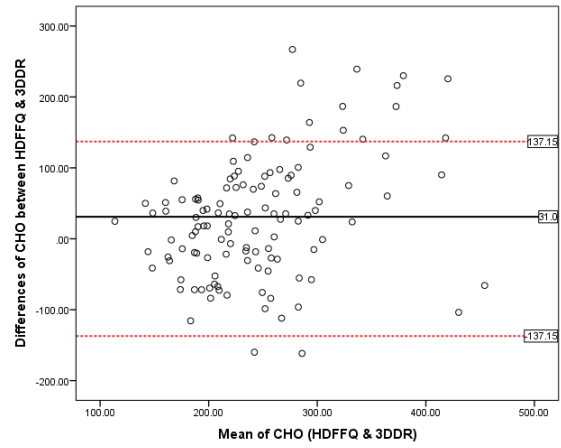

(B)

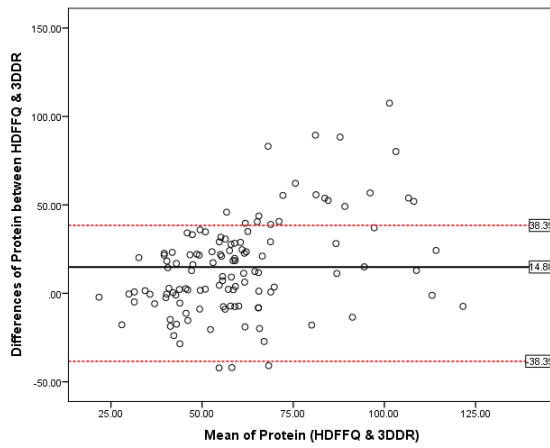

(C)

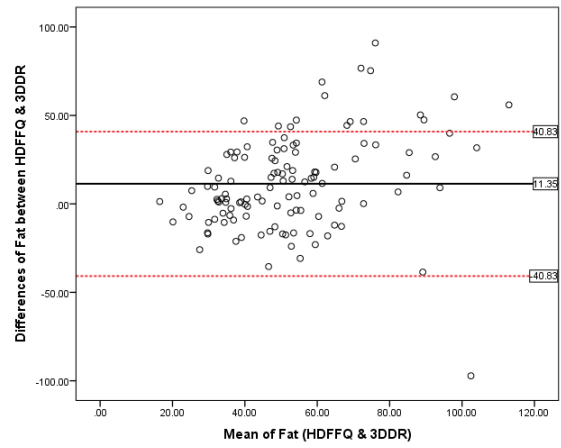

(D)

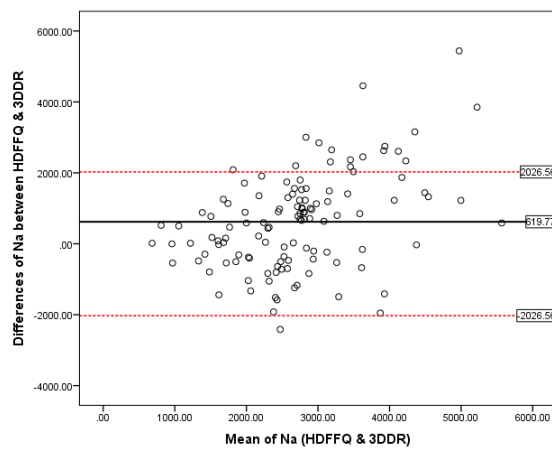

(E)

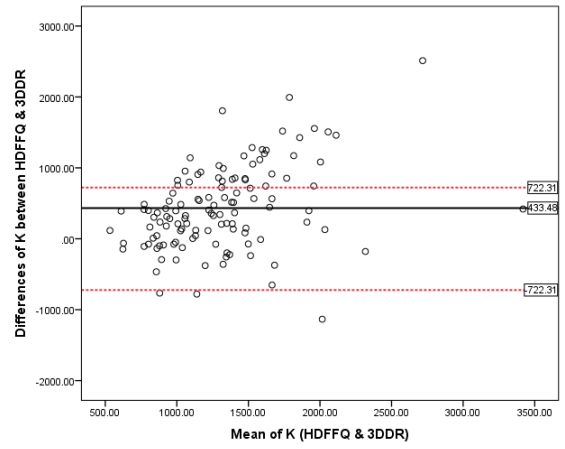

(F)

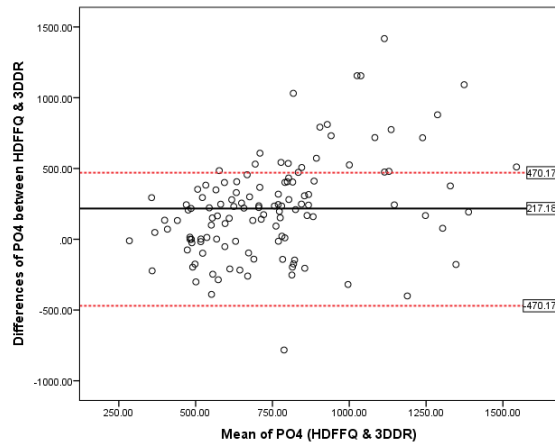

(G)

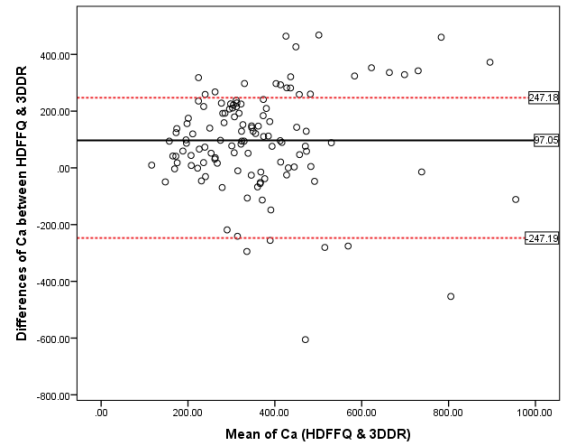

(H)

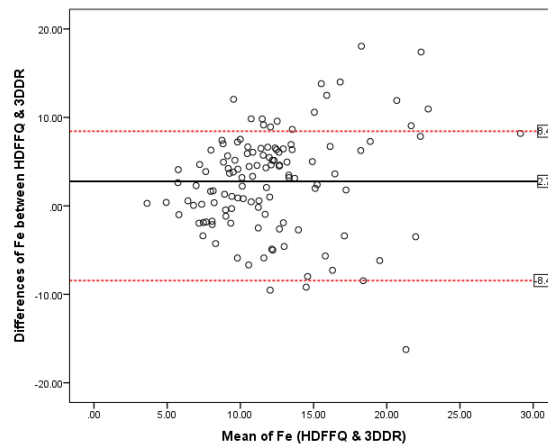

(I)

Note: Bland-Altman plots visualizing the agreement between the HD-FFQ and 3DDR to assess the intake of (A) Energy, (B) Carbohydrate, (C) Protein, (D) Fat, (E) Sodium, (F) Potassium, (G) Phosphate, (H) Calcium, and (I) Iron. For all plots, the middle line represent the mean differences between the HD-FFQ and 3DDR and limits of agreement (dotted line) indicates the 95% confidence interval (mean  $\pm$  1.96 SD). The linear regressions produced significant p-values ( $<0.05$ ) for all nutrients except for calcium:  $p=0.46$  and iron:  $p=0.05$ . The significant values indicates that the Bland-Altman plot is skewed (i.e. the difference in absolute intakes increased with increasing average intake, with the mean of HD-FFQ produce a higher estimates than the average 3DDR).

Table S4: Summary of comments from the expert and lay person

| No. | Open comments                                                                                                                              | Commenter      |
|-----|--------------------------------------------------------------------------------------------------------------------------------------------|----------------|
| 1.  | Layout easy to follow and the food items are relevant to local foods.                                                                      | Nephrologist 1 |
| 2.  | The HD-FFQ are not too long, but can consider to separate the questionnaire into two parts since patients might have short attention span. | Nephrologist 2 |
| 3.  | Suggest to show the household measure to patients during the administration of HD-FFQ. To improve patients portion size estimation.        | Dietitian 1    |
| 4.  | May consider to translate the HD-FFQ to 'Bahasa' or 'Mandarin' language.                                                                   | Dietitian 2    |
| 5.  | Usual food item consumption is available in the HD-FFQ.                                                                                    | Patient 1      |
| 6.  | Questionnaire is clear and easy to understand, but may consider to increase the font size as most of the dialysis patients are elderly.    | Patient 2      |

Table S5: Food item listing in the final HD-FFQ

| No.                     | Food Groupings                    | Subgroups                                                                                                      | Total food items |
|-------------------------|-----------------------------------|----------------------------------------------------------------------------------------------------------------|------------------|
| 1.                      | Cooked rice                       | -                                                                                                              | 7                |
| 2.                      | Noodles                           | 5 subgroups:<br>(a) Rice/starch noodles<br>(b) Wheat noodles<br>(c) Instant noodles<br>(d) Pasta<br>(e) Others | 12               |
| 3.                      | Cereals & products                | 4 subgroups:<br>(a) Biscuits<br>(b) Bread<br>(c) Bun/croissant<br>(d) Others                                   | 15               |
| 4.                      | Meat, poultry & products          | -                                                                                                              | 7                |
| 5.                      | Fish, shellfish & products        | -                                                                                                              | 5                |
| 6.                      | Legumes                           | -                                                                                                              | 3                |
| 7.                      | Vegetables                        | -                                                                                                              | 6                |
| 8.                      | Fruit                             | -                                                                                                              | 14               |
| 9.                      | Fast foods                        | -                                                                                                              | 5                |
| 10.                     | Milk & dairy products             | -                                                                                                              | 2                |
| 11.                     | Traditional kuih                  | 3 subgroups:<br>(a) Malay kuih<br>(b) Chinese kuih<br>(c) Indian kuih                                          | 7                |
| 12.                     | Bakery & sweets                   | -                                                                                                              | 4                |
| 13.                     | Snacks & finger foods             | -                                                                                                              | 9                |
| 14.                     | Jam & spread                      | -                                                                                                              | 4                |
| 15.                     | Beverages                         | 3 subgroups:<br>(a) Coffee/tea<br>(b) Malted drink<br>(c) Others                                               | 11               |
| 16.                     | Sauces, condiments & soups        | -                                                                                                              | 10               |
| 17.                     | Health/oral nutrition supplements | -                                                                                                              | 2                |
| <b>Total food items</b> |                                   |                                                                                                                | <b>123</b>       |

Subject Code:

| No.                                                                                        | Food                                                                                  | Taken (yes/no) | Frequency |          |           |        | Household measurements | Portion taken | Extra gravy (1 Tbsp) |
|--------------------------------------------------------------------------------------------|---------------------------------------------------------------------------------------|----------------|-----------|----------|-----------|--------|------------------------|---------------|----------------------|
|                                                                                            |                                                                                       |                | per day   | per week | per month | rarely |                        |               |                      |
| <b>Cooked Rice</b>                                                                         |                                                                                       |                |           |          |           |        |                        |               |                      |
| 1                                                                                          | White rice                                                                            |                |           |          |           |        | 1 small bowl           |               |                      |
| 2                                                                                          | Brown rice/Parboiled rice                                                             |                |           |          |           |        | 1 small bowl           |               |                      |
| 3                                                                                          | Nasi ayam*/Claypot<br>(*Fried/roasted/steamed chicken)                                |                |           |          |           |        | 1 serving              |               |                      |
| 4                                                                                          | Nasi lemak (Standard set)                                                             |                |           |          |           |        | 1 small bowl           |               |                      |
| 5                                                                                          | Fried rice                                                                            |                |           |          |           |        | 1 medium bowl          |               |                      |
| 6                                                                                          | Nasi Minyak/Beriani                                                                   |                |           |          |           |        | 1 medium bowl          |               |                      |
| 7                                                                                          | Porridge (Plain/Chicken/Fish/Pork)                                                    |                |           |          |           |        | 1 medium bowl          |               |                      |
| <b>Noodles</b> *please specify the amount of extra gravy if any                            |                                                                                       |                |           |          |           |        |                        |               |                      |
| <b>A Rice / Starch noodles (Mee hoon/Kuey teow/Loh see fun/Tang hoon)</b>                  |                                                                                       |                |           |          |           |        |                        |               |                      |
| 8                                                                                          | Fried/Dried                                                                           |                |           |          |           |        | 1 medium bowl          |               |                      |
| 9                                                                                          | Soup                                                                                  |                |           |          |           |        | 1 medium bowl          |               |                      |
| 10                                                                                         | Curry                                                                                 |                |           |          |           |        | 1 medium bowl          |               |                      |
| 11                                                                                         | Laksa/Cantonese                                                                       |                |           |          |           |        | 1 medium bowl          |               |                      |
| <b>B Wheat noodles (Yellow noodle/Wanton mee/Yee mee/Pan mee/Lor mee/Ramen/Misua/Udon)</b> |                                                                                       |                |           |          |           |        |                        |               |                      |
| 12                                                                                         | Fried/Dried                                                                           |                |           |          |           |        | 1 medium bowl          |               |                      |
| 13                                                                                         | Soup                                                                                  |                |           |          |           |        | 1 medium bowl          |               |                      |
| 14                                                                                         | Curry/Rebus                                                                           |                |           |          |           |        | 1 medium bowl          |               |                      |
| 15                                                                                         | Cantonese/Hokkien                                                                     |                |           |          |           |        | 1 medium bowl          |               |                      |
| <b>C Instant noodles</b>                                                                   |                                                                                       |                |           |          |           |        |                        |               |                      |
| 16                                                                                         | Fried/Dried                                                                           |                |           |          |           |        | 1 packet (m)           |               |                      |
| 17                                                                                         | Soup                                                                                  |                |           |          |           |        | 1 packet (m)           |               |                      |
| <b>D Pasta (Fettucini/Spaghetti/Macaroni)</b>                                              |                                                                                       |                |           |          |           |        |                        |               |                      |
| 18                                                                                         | Fried/Sauce*<br>(*White; Carbonara / Red; Bolognese)                                  |                |           |          |           |        | 1 medium bowl          |               |                      |
| <b>E Others</b>                                                                            |                                                                                       |                |           |          |           |        |                        |               |                      |
| 19                                                                                         | Chee Cheong Fun<br>(Plain/Char siew/Prawn)                                            |                |           |          |           |        | 1 piece                |               |                      |
| <b>Cereals and products</b>                                                                |                                                                                       |                |           |          |           |        |                        |               |                      |
| <b>A Biscuits</b>                                                                          |                                                                                       |                |           |          |           |        |                        |               |                      |
| 20                                                                                         | Sweet<br>(Cream filling/Marie/ jam, etc.)                                             |                |           |          |           |        | 1 piece                |               |                      |
| 21                                                                                         | Salty<br>(Cream cracker, etc.)                                                        |                |           |          |           |        | 1 piece                |               |                      |
| <b>B Bread</b>                                                                             |                                                                                       |                |           |          |           |        |                        |               |                      |
| 22                                                                                         | White                                                                                 |                |           |          |           |        | 1 slice                |               |                      |
| 23                                                                                         | Wholegrain/High fibre                                                                 |                |           |          |           |        | 1 slice                |               |                      |
| <b>C Bun/Croissant</b>                                                                     |                                                                                       |                |           |          |           |        |                        |               |                      |
| 24                                                                                         | Plain                                                                                 |                |           |          |           |        | 1 piece                |               |                      |
| 25                                                                                         | Sweet filling/Flavoured<br>(Vanilla/chocolate/corn/kaya/red bean/butter/coffee, etc.) |                |           |          |           |        | 1 piece                |               |                      |
| 26                                                                                         | Savoury<br>(Meat filling/Chicken floss/Ba kua/French toast/Mushroom, etc.)            |                |           |          |           |        | 1 piece                |               |                      |
| <b>D Others</b>                                                                            |                                                                                       |                |           |          |           |        |                        |               |                      |
| 27                                                                                         | Roti canai (Plain)                                                                    |                |           |          |           |        | 1 piece                |               |                      |
| 28                                                                                         | Roti canai (Egg/sardine)                                                              |                |           |          |           |        | 1 piece                |               |                      |



Subject Code:

| No                                                                                 | Food                                                                                                         | Taken (yes/no)     | Preparation Method                                                  | Frequency |          |           |         | Household measurements | Portion taken | Extra gravy (1 Tbsp) |  |
|------------------------------------------------------------------------------------|--------------------------------------------------------------------------------------------------------------|--------------------|---------------------------------------------------------------------|-----------|----------|-----------|---------|------------------------|---------------|----------------------|--|
|                                                                                    |                                                                                                              |                    |                                                                     | per day   | per week | per month | rarely  |                        |               |                      |  |
| <b>D Others</b>                                                                    |                                                                                                              |                    |                                                                     |           |          |           |         |                        |               |                      |  |
| 29                                                                                 | Chapati                                                                                                      |                    |                                                                     |           |          |           |         | 1 piece                |               |                      |  |
| 30                                                                                 | Thosai                                                                                                       |                    |                                                                     |           |          |           |         | 1 piece                |               |                      |  |
| 31                                                                                 | Idli                                                                                                         |                    |                                                                     |           |          |           |         | 1 piece                |               |                      |  |
| 32                                                                                 | Oats                                                                                                         |                    |                                                                     |           |          |           |         | 1 tablespoon           |               |                      |  |
| 33                                                                                 | Cereal Beverage (Eg: Nestum)<br>(Plain/Condensed milk)                                                       |                    |                                                                     |           |          |           |         | 1 glass                |               |                      |  |
| 34                                                                                 | Cereal Beverage (Eg: Nestum)<br>(3 in 1)                                                                     |                    |                                                                     |           |          |           |         | 1 sachet               |               |                      |  |
| <b>Meat, Poultry &amp; Products</b> *please specify amount of extra gravy if any   |                                                                                                              |                    |                                                                     |           |          |           |         |                        |               |                      |  |
| 35                                                                                 | Chicken                                                                                                      |                    | Fried/stir fried/grilled/<br>braised/ masak kicap                   |           |          |           |         | 1 matchbox             |               |                      |  |
|                                                                                    |                                                                                                              |                    | Curry/rendang/lemak/sambal<br>/satay                                |           |          |           |         | 1 matchbox             |               |                      |  |
|                                                                                    |                                                                                                              |                    | Steamed/soup                                                        |           |          |           |         | 1 matchbox             |               |                      |  |
| 36                                                                                 | Beef/Mutton/Lamb                                                                                             |                    | Fried/curry/<br>rendang/masak lemak/stir<br>fried/masak kicap/satay |           |          |           |         | 1 matchbox             |               |                      |  |
|                                                                                    |                                                                                                              |                    | Soup/masak pinang                                                   |           |          |           |         | 1 matchbox             |               |                      |  |
| 37                                                                                 | Pork                                                                                                         |                    | Fried/stir fried/grilled/<br>braised/masak kicap/roasted            |           |          |           |         | 1 matchbox             |               |                      |  |
|                                                                                    |                                                                                                              |                    | Steamed/soup                                                        |           |          |           |         | 1 matchbox             |               |                      |  |
| 38                                                                                 | Egg (with egg yolk)<br><br>(Chicken/Duck/Quail)                                                              |                    | Fried/omelette/<br>scrambled/sambal                                 |           |          |           |         | 1 whole                |               |                      |  |
|                                                                                    |                                                                                                              |                    | Curry/gulai                                                         |           |          |           |         | 1 whole                |               |                      |  |
|                                                                                    |                                                                                                              |                    | Boiled                                                              |           |          |           |         | 1 whole                |               |                      |  |
|                                                                                    |                                                                                                              |                    | Salted                                                              |           |          |           |         | 1 whole                |               |                      |  |
|                                                                                    |                                                                                                              |                    | Steamed                                                             |           |          |           |         | 1 whole                |               |                      |  |
|                                                                                    |                                                                                                              | Preserved/ Century |                                                                     |           |          |           | 1 whole |                        |               |                      |  |
|                                                                                    | Egg (white only)<br><br>(Chicken/Duck/Quail)                                                                 |                    | Fried/omelette/ scrambled/<br>sambal                                |           |          |           |         |                        | 1 whole       |                      |  |
|                                                                                    |                                                                                                              |                    | Curry/gulai                                                         |           |          |           |         |                        | 1 whole       |                      |  |
|                                                                                    |                                                                                                              |                    | Boiled                                                              |           |          |           |         |                        | 1 whole       |                      |  |
|                                                                                    |                                                                                                              |                    | Salted                                                              |           |          |           |         |                        | 1 whole       |                      |  |
|                                                                                    |                                                                                                              | Steamed            |                                                                     |           |          |           |         | 1 whole                |               |                      |  |
|                                                                                    | Preserved/Century                                                                                            |                    |                                                                     |           |          |           | 1 whole |                        |               |                      |  |
| <b>Processed food</b>                                                              |                                                                                                              |                    |                                                                     |           |          |           |         |                        |               |                      |  |
| 39                                                                                 | Nugget/Sausage/Meatball<br>(Chicken/Lap cheong/<br>Ham/Pork/Bacon)                                           |                    | Fried/stir fried                                                    |           |          |           |         | 1 piece                |               |                      |  |
|                                                                                    |                                                                                                              |                    | Steamed/Boiled/Soup                                                 |           |          |           |         | 1 piece                |               |                      |  |
| <b>Internal Organs</b> *please specify amount of extra gravy if any                |                                                                                                              |                    |                                                                     |           |          |           |         |                        |               |                      |  |
| 40                                                                                 | Beef/Chicken/Pork<br>(Gizzard/Liver/Intestine/<br>Lung/Heart)                                                |                    | Sambal/masak<br>lemak/fried/boiled                                  |           |          |           |         | 1 matchbox             |               |                      |  |
| <b>Fish, Shellfish &amp; Products</b> *please specify amount of extra gravy if any |                                                                                                              |                    |                                                                     |           |          |           |         |                        |               |                      |  |
| 41                                                                                 | Anchovies (Ikan Bilis)                                                                                       |                    | Fried/stir fried/sambal                                             |           |          |           |         | 1 tablespoon           |               |                      |  |
| 42                                                                                 | Sea fish<br>(Kembong/Bawal/Kerapu/<br>Kerisi/Merah/Parang/Salmon/S<br>ardine/Selar/Siakap/Tenggiri,<br>etc.) |                    | Fried/stir fried/masak kicap                                        |           |          |           |         | 1 matchbox             |               |                      |  |
|                                                                                    |                                                                                                              |                    | Curry/sambal/masak lemak                                            |           |          |           |         | 1 matchbox             |               |                      |  |
|                                                                                    |                                                                                                              |                    | Steamed/soup/singgang                                               |           |          |           |         | 1 matchbox             |               |                      |  |
|                                                                                    |                                                                                                              |                    | Canned                                                              |           |          |           |         | 1 matchbox             |               |                      |  |

Subject Code:

| No.                                                                                | Food                                                                                                                     | Taken (yes/no) | Preparation method                                       | Frequency |          |           |        | Household measurements | Portion taken | Extra gravy (1 Tbsp) |
|------------------------------------------------------------------------------------|--------------------------------------------------------------------------------------------------------------------------|----------------|----------------------------------------------------------|-----------|----------|-----------|--------|------------------------|---------------|----------------------|
|                                                                                    |                                                                                                                          |                |                                                          | per day   | per week | per month | Rarely |                        |               |                      |
| <b>Fish, Shellfish &amp; Products</b> *please specify amount of extra gravy if any |                                                                                                                          |                |                                                          |           |          |           |        |                        |               |                      |
| 43                                                                                 | Freshwater fish (Keli/Tilapia/Haruan/Patin, etc.)                                                                        |                | Fried/stir fried/masak kicap                             |           |          |           |        | 1 matchbox             |               |                      |
|                                                                                    |                                                                                                                          |                | Curry/masak lemak/sambal                                 |           |          |           |        | 1 matchbox             |               |                      |
|                                                                                    |                                                                                                                          |                | Steamed/soup                                             |           |          |           |        | 1 matchbox             |               |                      |
| 44                                                                                 | Crab/Prawn                                                                                                               |                | Fried/stir fried/masak kicap                             |           |          |           |        | 1 matchbox             |               |                      |
|                                                                                    |                                                                                                                          |                | Curry/masak lemak/sambal                                 |           |          |           |        | 1 matchbox             |               |                      |
|                                                                                    |                                                                                                                          |                | Steamed/soup                                             |           |          |           |        | 1 matchbox             |               |                      |
| 45                                                                                 | Squid/Shellfish* (Cockle/Lala/Abalone*)                                                                                  |                | Stir fried/ masak kicap/braised                          |           |          |           |        | 1 matchbox             |               |                      |
|                                                                                    |                                                                                                                          |                | Curry/masak lemak/sambal                                 |           |          |           |        | 1 matchbox             |               |                      |
|                                                                                    |                                                                                                                          |                | Steamed/soup                                             |           |          |           |        | 1 matchbox             |               |                      |
| <b>Processed food</b>                                                              |                                                                                                                          |                |                                                          |           |          |           |        |                        |               |                      |
| 46                                                                                 | Fish ball/Fishcake/Squid Ball                                                                                            |                | Fried/Stir fried                                         |           |          |           |        | 1 piece                |               |                      |
|                                                                                    |                                                                                                                          |                | Boiled/steamed/soup                                      |           |          |           |        | 1 piece                |               |                      |
| <b>Legumes</b> *please specify amount of extra gravy if any                        |                                                                                                                          |                |                                                          |           |          |           |        |                        |               |                      |
| 47                                                                                 | Tau hoo/Tau kua/Fucuk                                                                                                    |                | Fried                                                    |           |          |           |        | 1 piece                |               |                      |
| 48                                                                                 | Tau hoo/Tau hoo pok/Fucuk                                                                                                |                | Stir-fried/braised/masak kicap                           |           |          |           |        | 1 piece                |               |                      |
| 49                                                                                 | Tau hoo                                                                                                                  |                | Soup/steamed/boiled                                      |           |          |           |        | 1 piece                |               |                      |
| <b>Vegetables</b> *please specify amount of extra gravy if any                     |                                                                                                                          |                |                                                          |           |          |           |        |                        |               |                      |
| 50                                                                                 | Green leafy vegetable (Spinach/Kale/Sweet potato leave/Mustard green/kangkung/Pucuk Paku/Kucaj etc.)                     |                | Stir fried/curry/sambal                                  |           |          |           |        | 1 tablespoon           |               |                      |
|                                                                                    |                                                                                                                          |                | Masak air/soup/boiled                                    |           |          |           |        | 1 tablespoon           |               |                      |
|                                                                                    |                                                                                                                          |                | Raw/Ulam                                                 |           |          |           |        | 1 tablespoon           |               |                      |
| 51                                                                                 | Cruciferous vegetable (Cabbage/broccoli/cauliflower/lettuce/you mak/bak choy etc.)                                       |                | Stir fried/curry/masak lemak                             |           |          |           |        | 1 tablespoon           |               |                      |
|                                                                                    |                                                                                                                          |                | Soup/boiled/tom yam                                      |           |          |           |        | 1 tablespoon           |               |                      |
|                                                                                    |                                                                                                                          |                | Raw/ Ulam                                                |           |          |           |        | 1 tablespoon           |               |                      |
| 52                                                                                 | Beans vegetable (French/Long/Winged/ Tau geh etc.)                                                                       |                | Stir fried/curry/masak lemak                             |           |          |           |        | 1 tablespoon           |               |                      |
|                                                                                    |                                                                                                                          |                | Raw/ Ulam                                                |           |          |           |        | 1 tablespoon           |               |                      |
| 53                                                                                 | Fruit vegetable (Bitter gourd/Cucumber/ Pumpkin/ Baby corn/Petola/Lady finger/Brinjal/Winter melon/Plaintai/Chili, etc.) |                | Stir fried/curry/masak lemak/sambal                      |           |          |           |        | 1 small bowl           |               |                      |
|                                                                                    |                                                                                                                          |                | Boiled/soup                                              |           |          |           |        | 1 small bowl           |               |                      |
|                                                                                    |                                                                                                                          |                | Raw/ Ulam                                                |           |          |           |        | 1 small bowl           |               |                      |
| 54                                                                                 | Root vegetable (Potato/Sweet potato/Yam/Carrot/Radish/ Beetroot/Sengkuang/Lotus root, etc.)                              |                | Stir fried/braised/curry/ Masak lemak/sambal/masak kicap |           |          |           |        | 1 small bowl           |               |                      |
|                                                                                    |                                                                                                                          |                | Fried                                                    |           |          |           |        | 1 small bowl           |               |                      |
|                                                                                    |                                                                                                                          |                | Boiled/steam/soup                                        |           |          |           |        | 1 small bowl           |               |                      |
|                                                                                    |                                                                                                                          |                | Raw/ Ulam                                                |           |          |           |        | 1 small bowl           |               |                      |
| 55                                                                                 | Mixed vegies (Acar)                                                                                                      |                |                                                          |           |          |           |        | 1 tablespoon           |               |                      |

Subject Code:

| No                                                                                     | Food                                                                                                                     | Taken (yes/no) | Preparation method | Frequency |          |           |        | Household measurements | Portion taken | Extra gravy (1 Tbsp)   |
|----------------------------------------------------------------------------------------|--------------------------------------------------------------------------------------------------------------------------|----------------|--------------------|-----------|----------|-----------|--------|------------------------|---------------|------------------------|
|                                                                                        |                                                                                                                          |                |                    | per day   | per week | per month | rarely |                        |               |                        |
| <b>Fruit</b>                                                                           |                                                                                                                          |                |                    |           |          |           |        |                        |               |                        |
| *please specify amount of 'Flavouring, Eg: Asam Boi/Salt' if taken together with fruit |                                                                                                                          |                |                    |           |          |           |        |                        |               |                        |
| 56                                                                                     | Apple/Pear                                                                                                               |                |                    |           |          |           |        | 1 piece                |               | Asam Boi/Salt (1 tbsp) |
| 57                                                                                     | Banana                                                                                                                   |                |                    |           |          |           |        | 1 medium piece         |               |                        |
| 58                                                                                     | Dates ( <i>Kurma</i> )                                                                                                   |                |                    |           |          |           |        | 1 piece                |               |                        |
| 59                                                                                     | Seasonal fruit ( <i>Duku/Langsat/Rambutan</i> )                                                                          |                |                    |           |          |           |        | 1 piece                |               |                        |
| 60                                                                                     | Durian                                                                                                                   |                |                    |           |          |           |        | 1seed                  |               |                        |
| 61                                                                                     | Grapes                                                                                                                   |                |                    |           |          |           |        | 1 piece                |               |                        |
| 62                                                                                     | Guava                                                                                                                    |                |                    |           |          |           |        | 1 slice                |               |                        |
| 63                                                                                     | Mango                                                                                                                    |                |                    |           |          |           |        | 1slice                 |               |                        |
| 64                                                                                     | <i>Nangka</i>                                                                                                            |                |                    |           |          |           |        | 1 piece                |               |                        |
| 65                                                                                     | Citrus fruit ( <i>Orange/Limau Mandarin</i> )                                                                            |                |                    |           |          |           |        | 1 piece                |               |                        |
| 66                                                                                     | Papaya                                                                                                                   |                |                    |           |          |           |        | 1 slice                |               |                        |
| 67                                                                                     | Pineapple                                                                                                                |                |                    |           |          |           |        | 1 slice                |               |                        |
| 68                                                                                     | Melon ( <i>Watermelon/Honeydew</i> )                                                                                     |                |                    |           |          |           |        | 1 slice                |               |                        |
| 69                                                                                     | Starfruit                                                                                                                |                |                    |           |          |           |        | 1 whole                |               |                        |
| <b>Fast foods</b>                                                                      |                                                                                                                          |                |                    |           |          |           |        |                        |               |                        |
| 70                                                                                     | Fried chicken ( <i>KFC, McD, etc.</i> )                                                                                  |                |                    |           |          |           |        | 1 piece                |               |                        |
| 71                                                                                     | French fries/Potato wedges                                                                                               |                |                    |           |          |           |        | 1 small bowl           |               |                        |
| 72                                                                                     | Pizza                                                                                                                    |                |                    |           |          |           |        | 1 medium slice         |               |                        |
| 73                                                                                     | Burger ( <i>Beef/Chicken/Fish</i> )                                                                                      |                |                    |           |          |           |        | 1 whole (m)            |               |                        |
| 74                                                                                     | Salad/Coleslaw                                                                                                           |                |                    |           |          |           |        | 1 small bowl           |               |                        |
| <b>Milk &amp; Dairy products</b>                                                       |                                                                                                                          |                |                    |           |          |           |        |                        |               |                        |
| 75                                                                                     | Low fat milk powder ( <i>Omega/Anlene, etc.</i> )                                                                        |                |                    |           |          |           |        | 1 tablespoon           |               |                        |
| 76                                                                                     | Full cream milk powder ( <i>Fernleaf/Dutchlady, etc.</i> )                                                               |                |                    |           |          |           |        | 1 tablespoon           |               |                        |
| <b>Traditional Kuih</b>                                                                |                                                                                                                          |                |                    |           |          |           |        |                        |               |                        |
| <b>A Malay Kuih</b>                                                                    |                                                                                                                          |                |                    |           |          |           |        |                        |               |                        |
| 77                                                                                     | Fried ( <i>Pisang goreng/Cucur udang/Cucur bilis/Cucur sayur/Cekodok/Roti jala/Rempeyek/Pau Sambal/Karipap</i> )         |                |                    |           |          |           |        | 1 piece                |               |                        |
| 78                                                                                     | Sweet ( <i>Kuih bingka/Lempeng/Apam balik/Kuih Bakar/Kuih Ketayap/Bahulu/Kuih Kasui/Seri Muka/Kuih Koci/Kuih Talam</i> ) |                |                    |           |          |           |        | 1 piece                |               |                        |
| <b>B Chinese Kuih</b>                                                                  |                                                                                                                          |                |                    |           |          |           |        |                        |               |                        |
| 79                                                                                     | Fried Kuih ( <i>Eg: Yau Zha Kuih/Ham Chi Ping</i> )                                                                      |                |                    |           |          |           |        | 1 piece                |               |                        |
| 80                                                                                     | Steamed kuih ( <i>Pau Pork/Chocolate/Kaya/Coconut/Bak Tong Gou/Ang Koo Kueh</i> )                                        |                |                    |           |          |           |        | 1 piece                |               |                        |
| 81                                                                                     | Steamed Dumpling ( <i>Rice dumpling, Bak Zang/Loh mai kai/Loh mai fan</i> )                                              |                |                    |           |          |           |        | 1 piece                |               |                        |
| <b>C Indian Kuih</b>                                                                   |                                                                                                                          |                |                    |           |          |           |        |                        |               |                        |
| 82                                                                                     | Fried ( <i>Vadai/Samosa</i> )                                                                                            |                |                    |           |          |           |        | 1 piece                |               |                        |
| 83                                                                                     | Steamed ( <i>Idiyappam/Puttu</i> )                                                                                       |                |                    |           |          |           |        | 1 piece                |               |                        |
| <b>Bakery &amp; Sweets</b>                                                             |                                                                                                                          |                |                    |           |          |           |        |                        |               |                        |
| 84                                                                                     | Cakes ( <i>Plain/Sponge cake</i> )                                                                                       |                |                    |           |          |           |        | 1 slice                |               |                        |
| 85                                                                                     | Cakes, Cream/Flavoured ( <i>Banana/Carrot/Chocolate/Red velvet/Tiramisu/Butter/Cheese, etc.</i> )                        |                |                    |           |          |           |        | 1 slice                |               |                        |
| 86                                                                                     | Doughnut ( <i>Plain/Sugar/Icing</i> )                                                                                    |                |                    |           |          |           |        | 1 piece                |               |                        |
| 87                                                                                     | Jelly/Agar/Dadih                                                                                                         |                |                    |           |          |           |        | 1 piece                |               |                        |

Subject Code:

| No                                    | Food                                                          | Taken (yes/no) | Preparation method | Frequency |          |           |        | Household measurements    | Portion taken | Extra gravy (1 Tbsp) |
|---------------------------------------|---------------------------------------------------------------|----------------|--------------------|-----------|----------|-----------|--------|---------------------------|---------------|----------------------|
|                                       |                                                               |                |                    | per day   | per week | per month | rarely |                           |               |                      |
| <b>Snacks &amp; Finger Foods</b>      |                                                               |                |                    |           |          |           |        |                           |               |                      |
| 88                                    | <i>Muruku</i>                                                 |                |                    |           |          |           |        | 1 piece                   |               |                      |
| 89                                    | <i>Keropok (Ikan/Prawn/Lekor)</i>                             |                |                    |           |          |           |        | 1 piece                   |               |                      |
| 90                                    | <i>Popiah</i>                                                 |                | Fried              |           |          |           |        | 1 piece                   |               |                      |
|                                       |                                                               |                | Basah              |           |          |           |        | 1 piece                   |               |                      |
| 91                                    | <i>Dim sum</i>                                                |                | Fried              |           |          |           |        | 1 piece                   |               |                      |
|                                       |                                                               |                | Steamed            |           |          |           |        | 1 piece                   |               |                      |
| 92                                    | <i>Sushi</i>                                                  |                |                    |           |          |           |        | 1 piece                   |               |                      |
| 93                                    | <i>Sandwich (Egg/Chicken/Ham/Tuna)</i>                        |                |                    |           |          |           |        | 1 set (2 slices of bread) |               |                      |
| 94                                    | <i>Yong tau foo (Lady finger/Bitter gourd/Brinjal/Chilli)</i> |                | Fried              |           |          |           |        | 1 piece                   |               |                      |
|                                       |                                                               |                | Boiled             |           |          |           |        | 1 piece                   |               |                      |
| 95                                    | <i>Yong tau foo (Tau hoo/Tau pok)</i>                         |                | Fried              |           |          |           |        | 1 piece                   |               |                      |
|                                       |                                                               |                | Boiled             |           |          |           |        | 1 piece                   |               |                      |
| 96                                    | <i>Kebab (Beef/Chicken/Fish/Mutton)</i>                       |                |                    |           |          |           |        | 1 piece                   |               |                      |
| <b>Jam &amp; Spread</b>               |                                                               |                |                    |           |          |           |        |                           |               |                      |
| 97                                    | Butter                                                        |                |                    |           |          |           |        | 1 teaspoon                |               |                      |
| 98                                    | <i>Fruit jam (Pineapple/strawberry, etc.)</i>                 |                |                    |           |          |           |        | 1 teaspoon                |               |                      |
| 99                                    | Kaya                                                          |                |                    |           |          |           |        | 1 teaspoon                |               |                      |
| 100                                   | Margarine                                                     |                | Salted             |           |          |           |        | 1 teaspoon                |               |                      |
|                                       |                                                               |                | Unsalted           |           |          |           |        | 1 teaspoon                |               |                      |
| <b>Beverages</b>                      |                                                               |                |                    |           |          |           |        |                           |               |                      |
| <b>A Coffee/Tea</b>                   |                                                               |                |                    |           |          |           |        |                           |               |                      |
| 101                                   | 'Tarik/ 'C'/Canned/ milk                                      |                |                    |           |          |           |        | 1 glass                   |               |                      |
| 102                                   | O (with sugar)                                                |                |                    |           |          |           |        | 1 glass                   |               |                      |
| 103                                   | 3 in 1                                                        |                |                    |           |          |           |        | 1 sachet                  |               |                      |
| 104                                   | 2 in 1 (with sugar only)                                      |                |                    |           |          |           |        | 1 sachet                  |               |                      |
| 105                                   | With Non-dairy creamer                                        |                |                    |           |          |           |        | 1 glass                   |               |                      |
| <b>B Malted Drink</b>                 |                                                               |                |                    |           |          |           |        |                           |               |                      |
| 106                                   | Condensed milk/Sugar/Plain                                    |                |                    |           |          |           |        | 1 glass                   |               |                      |
| 107                                   | 3 in 1                                                        |                |                    |           |          |           |        | 1 sachet                  |               |                      |
| <b>C Other drinks</b>                 |                                                               |                |                    |           |          |           |        |                           |               |                      |
| 108                                   | Cordial/Syrup                                                 |                |                    |           |          |           |        | 1 glass                   |               |                      |
| 109                                   | Fresh juice/Barley/Herbal drink                               |                |                    |           |          |           |        | 1 glass                   |               |                      |
| 110                                   | Sugar Sweetened Beverage ( <i>Soy bean milk, etc.</i> )       |                |                    |           |          |           |        | 1 glass                   |               |                      |
| 111                                   | Carbonated/Isotonic drink ( <i>100 plus/coke, etc.</i> )      |                |                    |           |          |           |        | 1 can                     |               |                      |
| <b>Sauces, Condiments &amp; Soups</b> |                                                               |                |                    |           |          |           |        |                           |               |                      |
| 112                                   | <i>Budu/Cincajuk</i>                                          |                |                    |           |          |           |        | 1 tablespoon              |               |                      |
| 113                                   | Bottled Sauce ( <i>Chilli/Tomato</i> )                        |                |                    |           |          |           |        | 1 tablespoon              |               |                      |
| 114                                   | <i>Coconut Chutney</i>                                        |                |                    |           |          |           |        | 1 tablespoon              |               |                      |
| 115                                   | <i>Tomato/Mint Chutney</i>                                    |                |                    |           |          |           |        | 1 tablespoon              |               |                      |
| 116                                   | <i>Sambal tumis</i>                                           |                |                    |           |          |           |        | 1 tablespoon              |               |                      |
| 117                                   | <i>Sambal belacan</i>                                         |                |                    |           |          |           |        | 1 tablespoon              |               |                      |
| 118                                   | Soy sauce (Light/dark)                                        |                |                    |           |          |           |        | 1 tablespoon              |               |                      |
| 119                                   | <i>Chilli (Pickled/Cutted/with soy sauce)</i>                 |                |                    |           |          |           |        | 1 tablespoon              |               |                      |

Subject Code:

| No.                                        | Food                                                                    | Taken (yes/no) | Preparation method | Frequency |          |           |        | Household measurements | Portion taken | Extra gravy (1 Tbsp) |
|--------------------------------------------|-------------------------------------------------------------------------|----------------|--------------------|-----------|----------|-----------|--------|------------------------|---------------|----------------------|
|                                            |                                                                         |                |                    | per day   | per week | per month | rarely |                        |               |                      |
| <b>Sauces, Condiments &amp; Soups</b>      |                                                                         |                |                    |           |          |           |        |                        |               |                      |
| 120                                        | Dhal/ Green gram                                                        |                | Curry (Santan)     |           |          |           |        | 1 tablespoon           |               |                      |
|                                            |                                                                         |                | Curry (No santan)  |           |          |           |        | 1 tablespoon           |               |                      |
| <b>Soup (only)</b>                         |                                                                         |                |                    |           |          |           |        |                        |               |                      |
| 121                                        | Clear soup (Herbal/Vegetable soup/Chicken/Fish/Fishball/Meatball, etc.) |                |                    |           |          |           |        | 1 small bowl           |               |                      |
| <b>Health / Oral Nutrition Supplements</b> |                                                                         |                |                    |           |          |           |        |                        |               |                      |
| 122                                        | Oral Nutrition Supplements; Ready To Drink (Please specify: )           |                |                    |           |          |           |        | 1 bottle/packet        |               |                      |
| 123                                        | Oral Nutrition Supplements; Powder (Please specify: )                   |                |                    |           |          |           |        | 1 scoop/sachet         |               |                      |
|                                            | Others:                                                                 |                |                    |           |          |           |        |                        |               |                      |

Table S6: Snapshot of the HD-FFQ Form

Table S7: Identification of misreporters according to EI: BMR Category

| <b>EI:BMR Category</b>     | <b>3DDR (n=152)</b> | <b>HD-FFQ (n=152)</b> |
|----------------------------|---------------------|-----------------------|
| <b>Under-reporter</b>      | 16 (11%)            | 11 (7%)               |
| <b>Acceptable-reporter</b> | 136 (89%)           | 133 (88%)             |
| <b>Over-reporter</b>       | -                   | 8 (5%)                |

Note: Data are presented as number and percentage; n (%).

Abbreviations: EI: BMR: Energy Intake: Basal Metabolic Rate, 3DDR: 3-Day Diet Recalls, HD-FFQ: Hemodialysis Food Frequency Questionnaire
